# Supplementary material for: Diatom responses and geochemical feedbacks to environmental changes at Lake Rauchuagytgyn (Far East Russian Arctic)
Source: Copernicus journal article supplement (doi:10.5194/bg-20-1691-2023), 2023-05-04
Supplement: Supplementary file 1 [file bg-20-1691-2023-supplement.pdf]

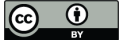

*Supplement of*

## **Diatom responses and geochemical feedbacks to environmental changes at Lake Raichuagytygn (Far East Russian Arctic)**

**Boris K. Biskaborn et al.**

*Correspondence to:* Boris K. Biskaborn ([boris.biskaborn@awi.de](mailto:boris.biskaborn@awi.de))

The copyright of individual parts of the supplement might differ from the article licence.

## Supplementary figures

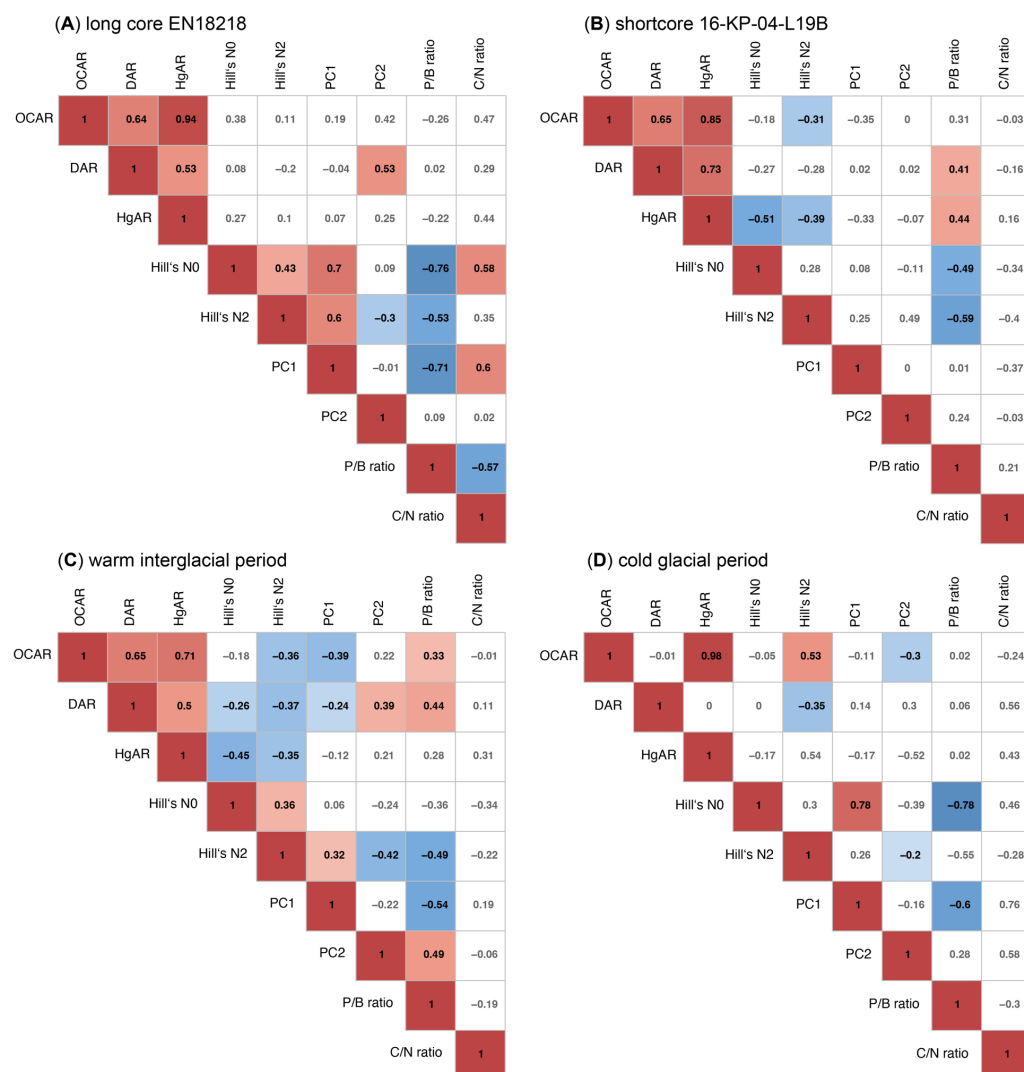

Figure S1: Pearson correlation matrix between organic matter, diatom indices, and mercury variables. Red, positive correlations; blue, negative correlations. p values correction of <0.05 was applied to assign colors only to significant correlations. Insignificant correlations shown as grey numbers within white cells. Panels A and B represent correlations within the individual core records. Panels B and C represent correlations in the warm period including the short core and the Holocene part of core EN18218 (C), and the cold period restricted to the pre-Holocene part of core EN18218 (D).

## Supplementary tables

Table S2: Hydrochemical parameters of Lake Rauchuagytgyn, measured from water retrieved 19<sup>th</sup> July 2018. Averages values from three lake surface locations adopted from Vyse et al. (2021).

| Parameter                                            | Value  |
|------------------------------------------------------|--------|
| Secchi depth (m below water surface)                 | 3.9    |
| Dissolved organic carbon (DOC) (mg L <sup>-1</sup> ) | 0.89   |
| Conductivity (μS cm <sup>-1</sup> )                  | 85.5   |
| pH                                                   | 7.81   |
| Water temperature (°C)                               | 7.9    |
| Fluoride (mg L <sup>-1</sup> )                       | < 0.05 |
| Chloride (mg L <sup>-1</sup> )                       | 0.81   |
| Sulphate (mg L <sup>-1</sup> )                       | 29.69  |
| Bromide (mg L <sup>-1</sup> )                        | < 0.05 |
| Nitrate (mg L <sup>-1</sup> )                        | 0.51   |
| Phosphate (mg L <sup>-1</sup> )                      | < 0.10 |
| Al (ug L <sup>-1</sup> )                             | < 100  |
| Ba (ug L <sup>-1</sup> )                             | < 20   |
| Ca (mg L <sup>-1</sup> )                             | 12.0   |
| Fe (ug L <sup>-1</sup> )                             | < 100  |
| K (mg L <sup>-1</sup> )                              | 0.31   |
| Mg (mg L <sup>-1</sup> )                             | 1.98   |
| Mn (ug L <sup>-1</sup> )                             | < 20   |
| Na (mg L <sup>-1</sup> )                             | 0.88   |
| P (mg L <sup>-1</sup> )                              | < 0.1  |
| Si (mg L <sup>-1</sup> )                             | 1.35   |
| Sr (ug L <sup>-1</sup> )                             | 61     |

## References

Vyse, S. A., Herzsuh, U., Pfalz, G., Pestryakova, L. A., Diekmann, B., Nowaczyk, N., and Biskaborn, B. K.: Sediment and carbon accumulation in a glacial lake in Chukotka (Arctic Siberia) during the Late Pleistocene and Holocene: combining hydroacoustic profiling and down-core analyses, *Biogeosciences*, 18, 4791-4816, 10.5194/bg-18-4791-2021, 2021.
